# Supplementary material
Source: HighWire-hosted journal article supplement (https://jnm.snmjournals.org/highwire/filestream/110331/field_highwire_adjunct_files/0/264021_Supplemental_Data.pdf)
Supplement: 264021_Supplemental_Data.pdf [file 264021_Supplemental_Data.pdf]

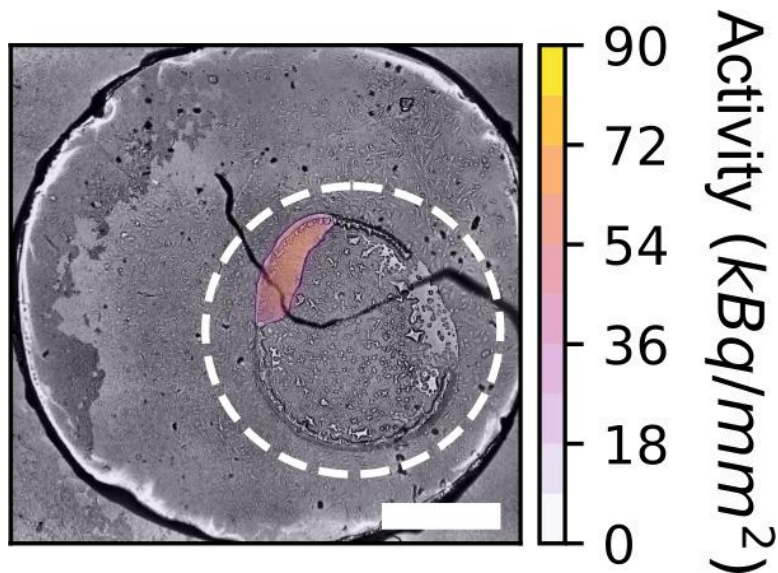

Supplemental Figure 1: Merged brightfield/beta image of a dried  $^{18}\text{F}$ -FDG drop. Scale bar is 500 microns.

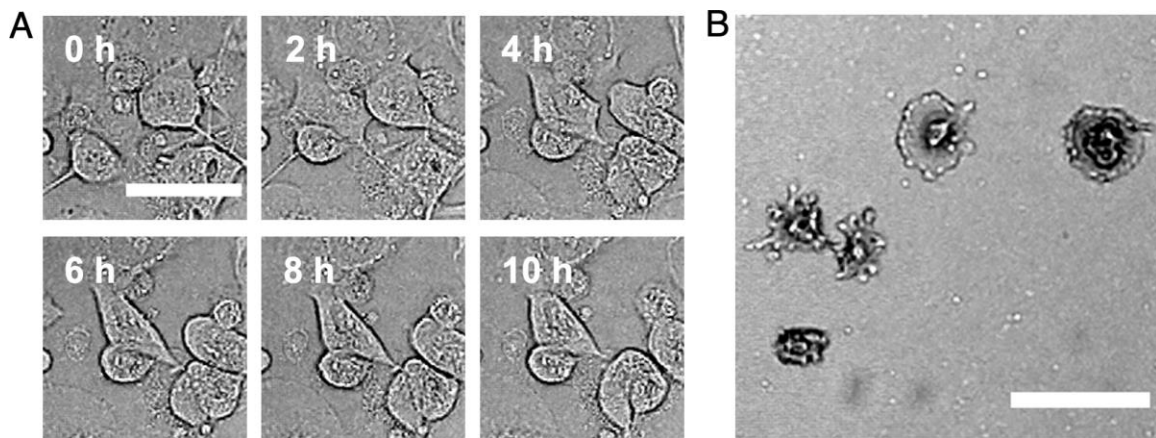

Supplemental Figure 2: Brightfield imaging of live and fixed cells. (A) Time lapse brightfield images of MDA-MB-231 cells up to 10 hours. Scale bar is 50  $\mu\text{m}$ . (B) Irradiated MDA-MB-231 cells (8 Gy dose), fixed and stained with crystal violet blue. Scale bar is 100  $\mu\text{m}$ .

Supplemental Video 1: Time-lapse brightfield movie of MDA-MB231 cells. Cells were imaged every 5 min for a total of 10 hours. Movie represents 462  $\mu\text{m}$  by 462  $\mu\text{m}$  subset of field-of-view. Scale bar is 100  $\mu\text{m}$ .

Supplemental Video 2: Decay-corrected kinetic  $^{18}\text{F}$ FDG LRM movie of MDA-MB231 cells. Cells were incubated with 5 MBq/mL  $^{18}\text{F}$ FDG and imaged immediately. Each frame is 10 minutes of beta signal integration time. Total imaging time is 190 minutes. Movie represents 462  $\mu\text{m}$  by 462  $\mu\text{m}$  subset of field-of-view. Scale bar is 100  $\mu\text{m}$ .
